# Supplementary material for: Efficient aqueous solubilization of methylxanthines via complexation with natural polyphenolate salts
Source: Royal Society of Chemistry journal article supplement (doi:10.1039/d5ra09568a), 2026-04-23
Supplement: d5ra09568a1.pdf [file d5ra09568a1.pdf]

## Supplementary Materials.

E. Hamonou<sup>1,2</sup>, S. Antonczak<sup>2</sup>, I. G. Shenderovich<sup>1</sup>, D. Touraud<sup>1</sup>, W. Kunz<sup>1</sup>, N. Papaiconomou<sup>2,\*</sup>

1: Universität Regensburg, Institute of physical and theoretical chemistry, Regensburg, Germany

2 : Université Côte d'Azur, CNRS, Institut de Chimie de Nice, UMR 7272, Nice, France.

\*: To whom correspondence should be addressed: Nicolas.papaiconomou@univ-cotedazur.fr

### **1H NMR of caffeine and complexing agent aqueous solutions:**

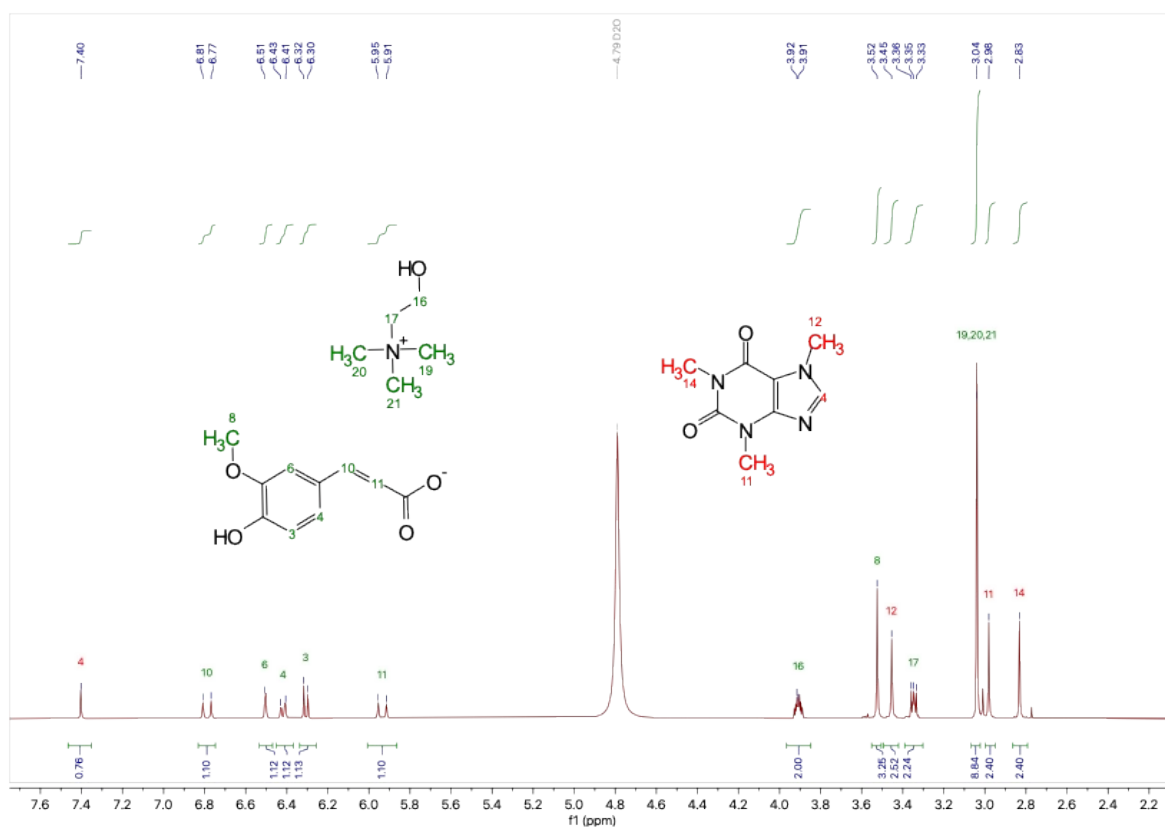

Figure S1: 1H NMR Spectrum of a 3M Cholinium Ferulate and 2.5 M caffeine aqueous solution.

$\delta_{\text{H}}$  (400 MHz, D<sub>2</sub>O) 7.40 (1 H, s), 6.79 (1 H, d,  $J$  16.0), 6.51 (1 H, s), 6.42 (1 H, d,  $J$  10.2), 6.31 (1 H, d,  $J$  8.1), 5.93 (1 H, d,  $J$  16.0), 3.91 (2 H, s), 3.52 (3 H, s), 3.45 (3 H, s), 3.40 – 3.30 (2 H, m), 3.04 (9 H, s), 2.98 (3 H, s), 2.83 (3 H, s).

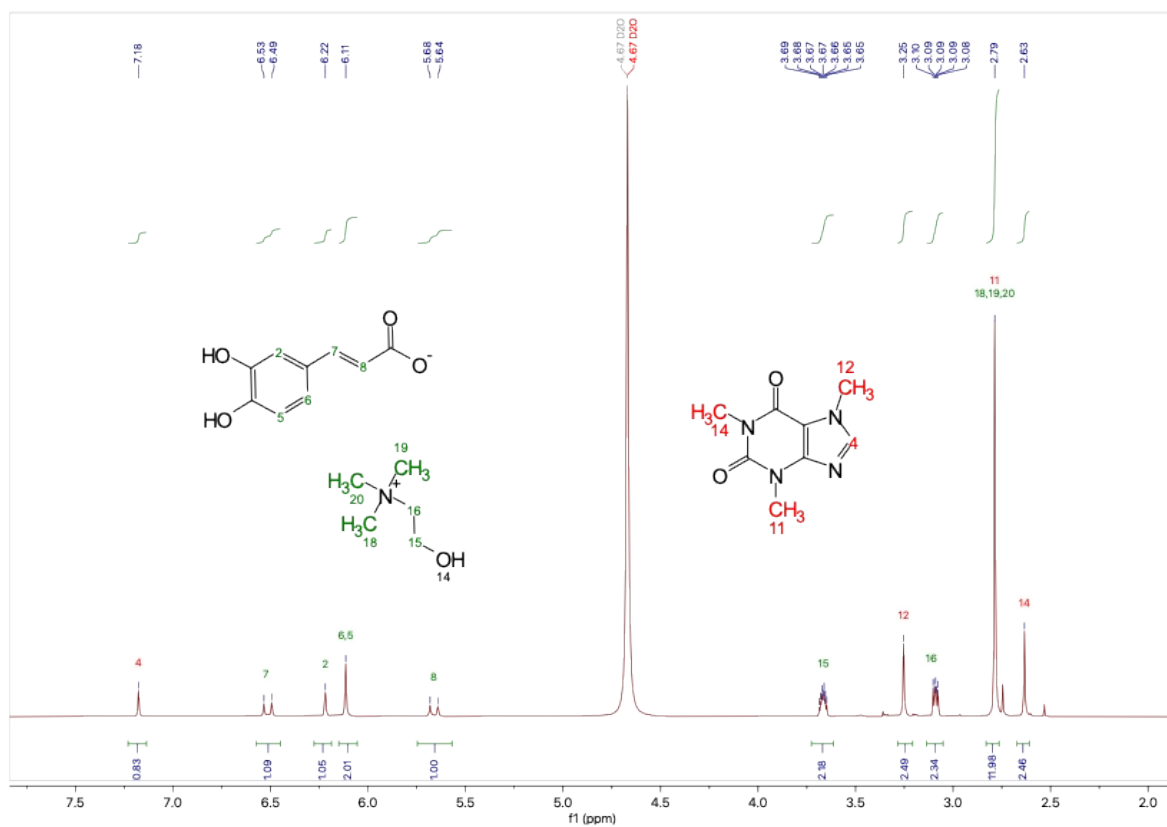

Figure S2:  $^1\text{H}$  NMR Spectrum of a 3.5M Cholinium Caffeate and 2.5M caffeine aqueous solution

$\delta_{\text{H}}$  (400 MHz,  $\text{D}_2\text{O}$ ) 7.18 (1 H, s), 6.51 (1 H, d, J 15.9), 6.48 (1 H, s), 6.22 (1 H, s), 6.11 (2 H, s), 5.66 (1 H, d, J 15.9), 3.71 – 3.63 (2 H, m), 3.25 (3 H, s), 3.12 – 3.05 (2 H, m), 2.79 (12 H, s), 2.63 (3 H, s).

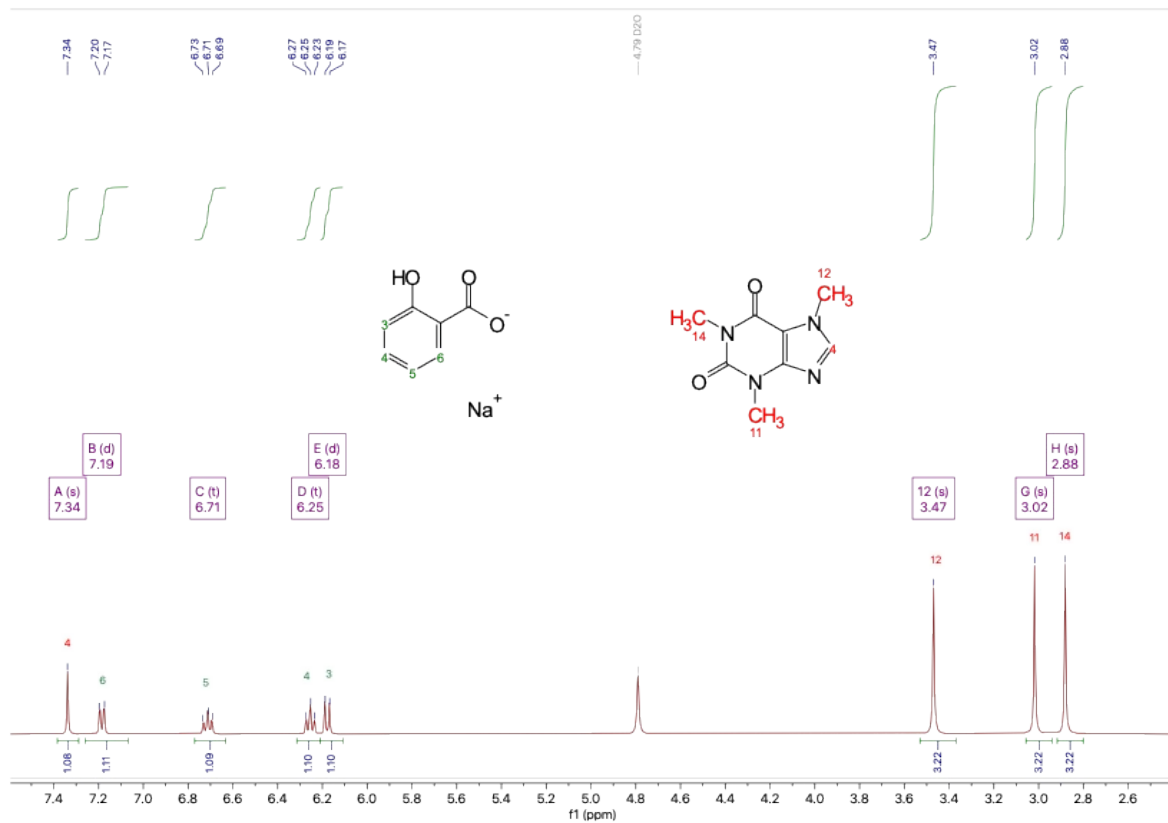

Figure S3:  $^1\text{H}$  NMR Spectrum of a 3M NaSalicylate and 3M caffeine aqueous solution.

$\delta_{\text{H}}$  (400 MHz,  $\text{D}_2\text{O}$ ) 7.34 (1 H, s), 7.19 (1 H, d, J 9.5), 6.71 (1 H, t), 6.25 (1 H, t, J 8.1), 6.18 (1 H, d, J 8.2), 3.47 (3 H, s), 3.02 (3 H, s), 2.88 (3 H, s).

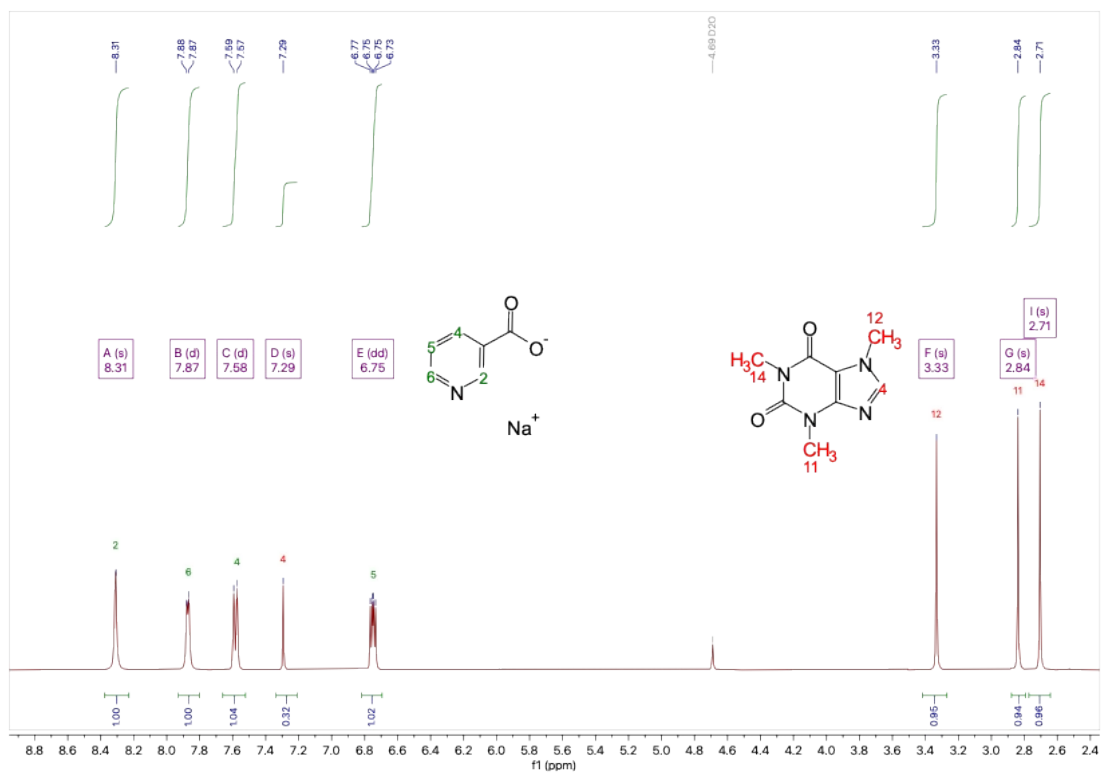

Figure S4: 1H NMR Spectrum of a 3M NaNicotinate 0.8M caffeine aqueous solution.

$\delta_H$  (400 MHz,  $D_2O$ ) 8.31 (1 H, s), 7.87 (1 H, d, J 5.0), 7.58 (1 H, d, J 8.0), 7.29 (1 H, s), 6.75 (2 H, dd, J 7.9, 4.9), 3.33 (3 H, s), 2.84 (3 H, s), 2.71 (3 H, s).

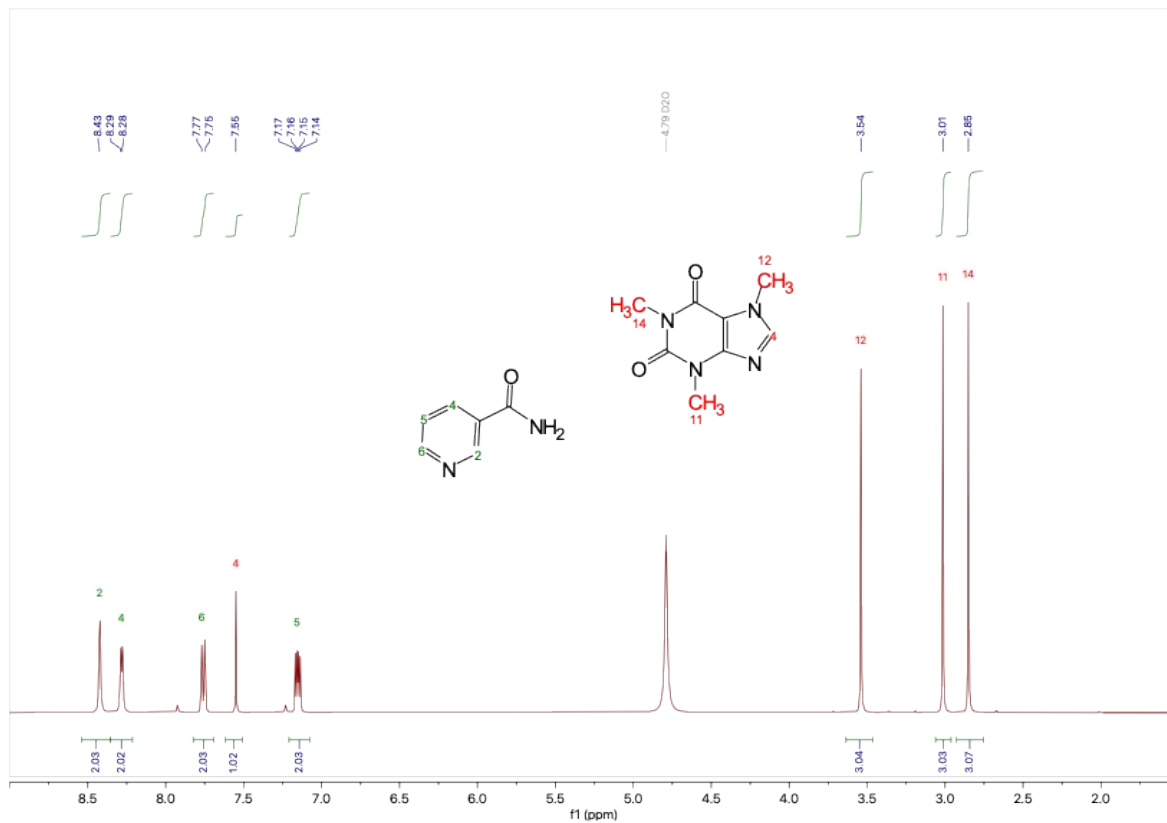

Figure S5:  $^1\text{H}$  NMR Spectrum of a 3M Niacinamide and 1.5M caffeine aqueous solution.

$\delta_{\text{H}}$  (400 MHz,  $\text{D}_2\text{O}$ ) 8.43 (1 H, s), 8.29 (1 H, d, J 5.0), 7.76 (1 H, d, J 8.2), 7.55 (1 H, s), 7.15 (2 H, dd, J 8.1, 4.9), 3.54 (3 H, s), 3.01 (3 H, s), 2.85 (3 H, s).

### $^1\text{H}$ NMR shielding due to complexation:

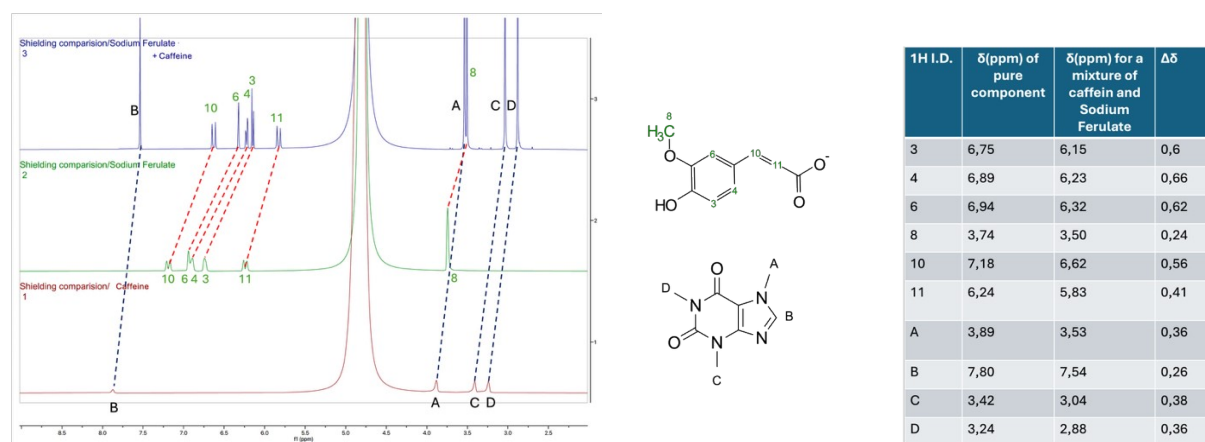

Figure S6:  $^1\text{H}$  NMR peak shifting in aqueous solution of 1) caffeine, 2) Sodium Ferulate, 3) Mixture of caffeine and Sodium Ferulate ICI RAJOUTER ASSIGNMENTS SUR SPECTRE.

## ROESY spectrum analyses for qualitative analysis

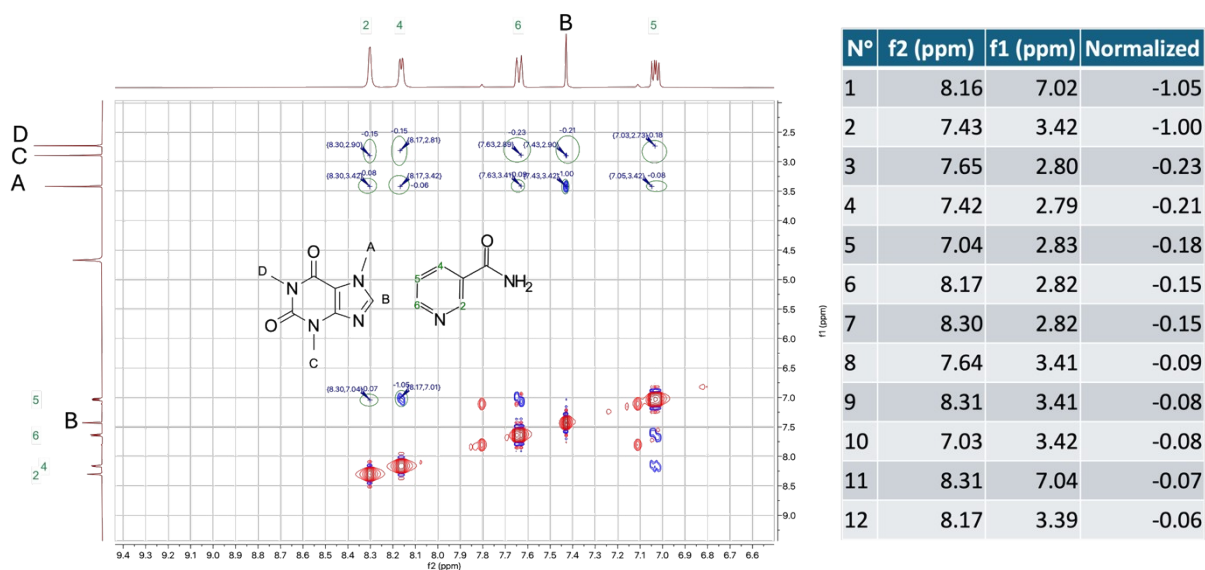

Figure S7: ROESY Spectrum of an aqueous solution at  $3\text{mol.kg}^{-1}$  of Niacinamide and  $1.5\text{mol.kg}^{-1}$  of Caffein

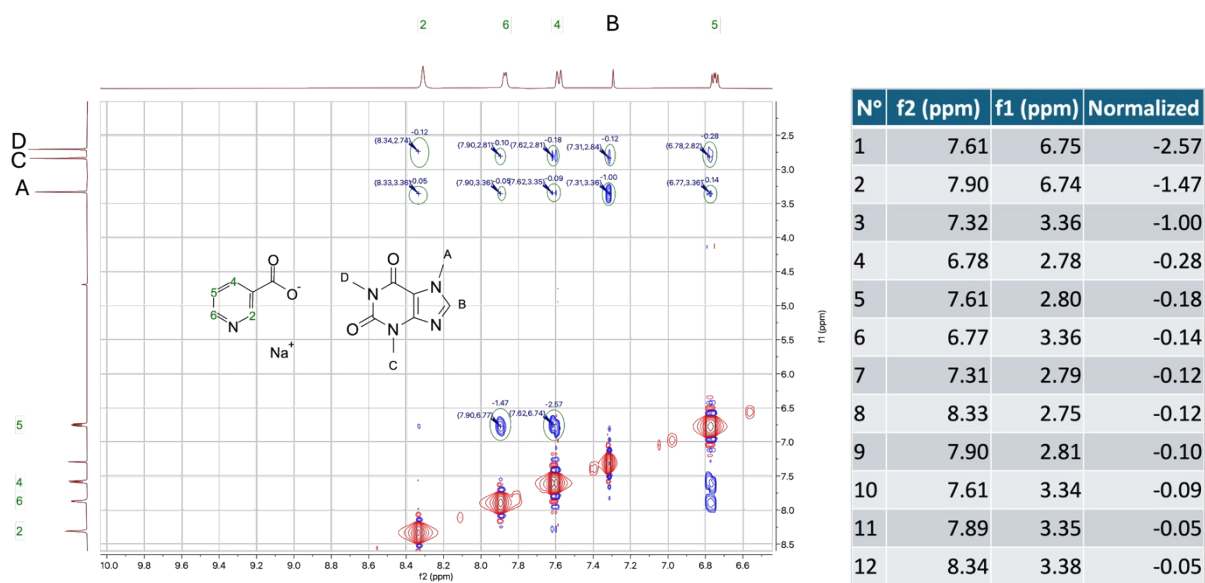

Figure S8: ROESY Spectrum of an aqueous solution at  $3\text{mol.kg}^{-1}$  of NaNicotinate and  $0.9\text{mol.kg}^{-1}$  of Caffein

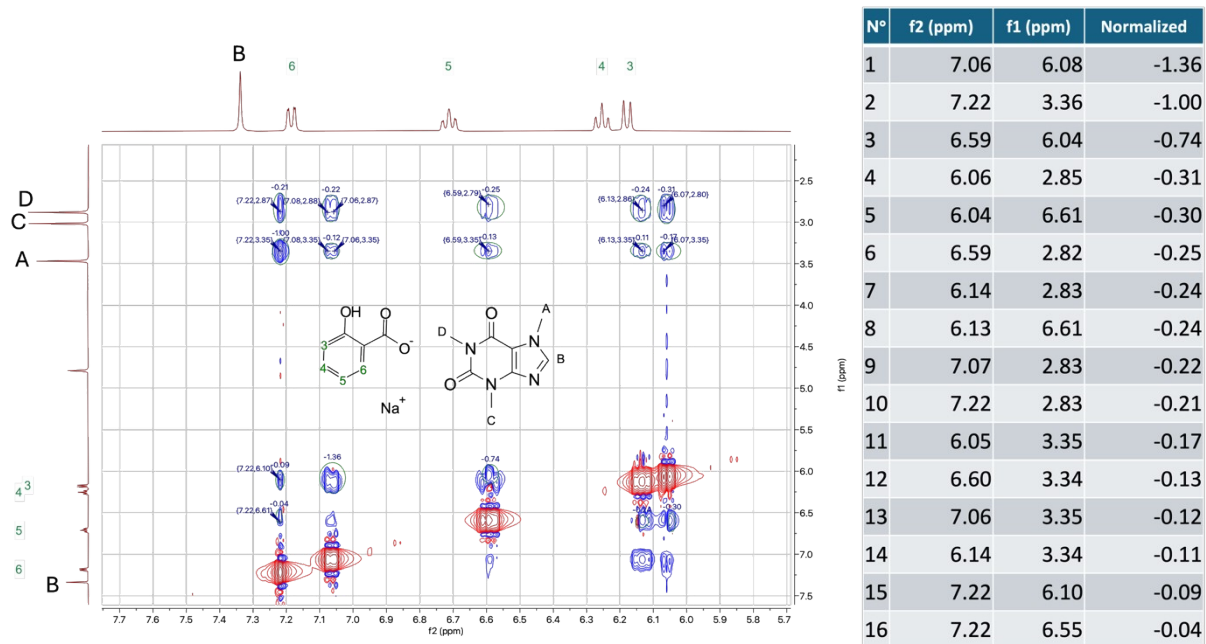

Figure S9: ROESY Spectrum of an aqueous solution at 3 mol.kg<sup>-1</sup> of NaSalicylate and 3 mol.kg<sup>-1</sup> of Caffeine

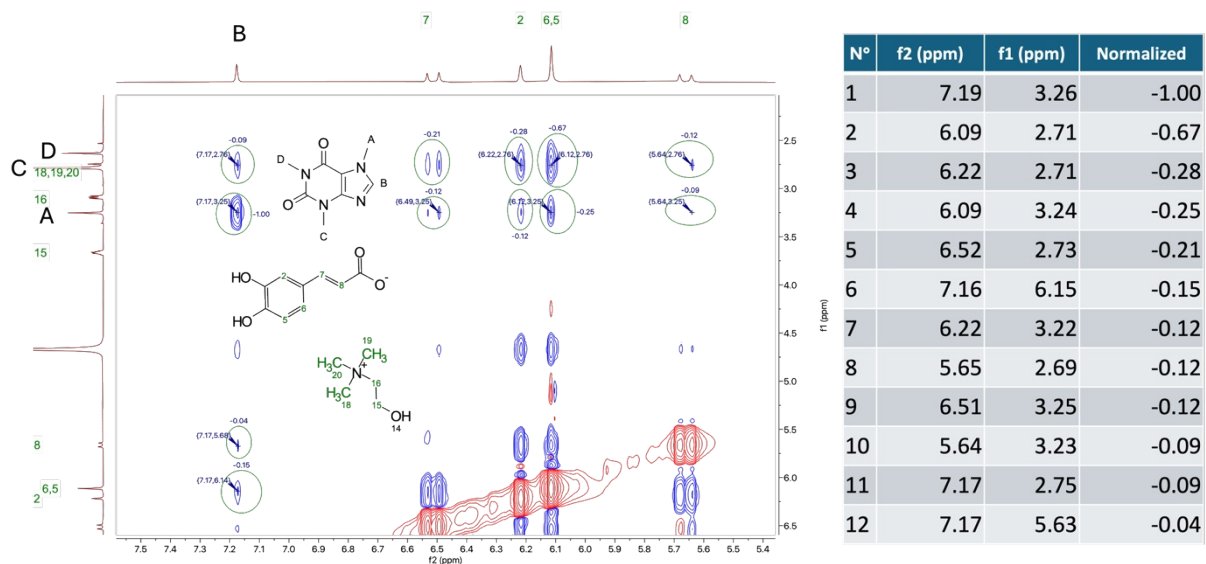

Figure S10: ROESY Spectrum of an aqueous solution at 3.5 mol.kg<sup>-1</sup> of ChCaffeate and 2.5 mol.kg<sup>-1</sup> of Caffeine

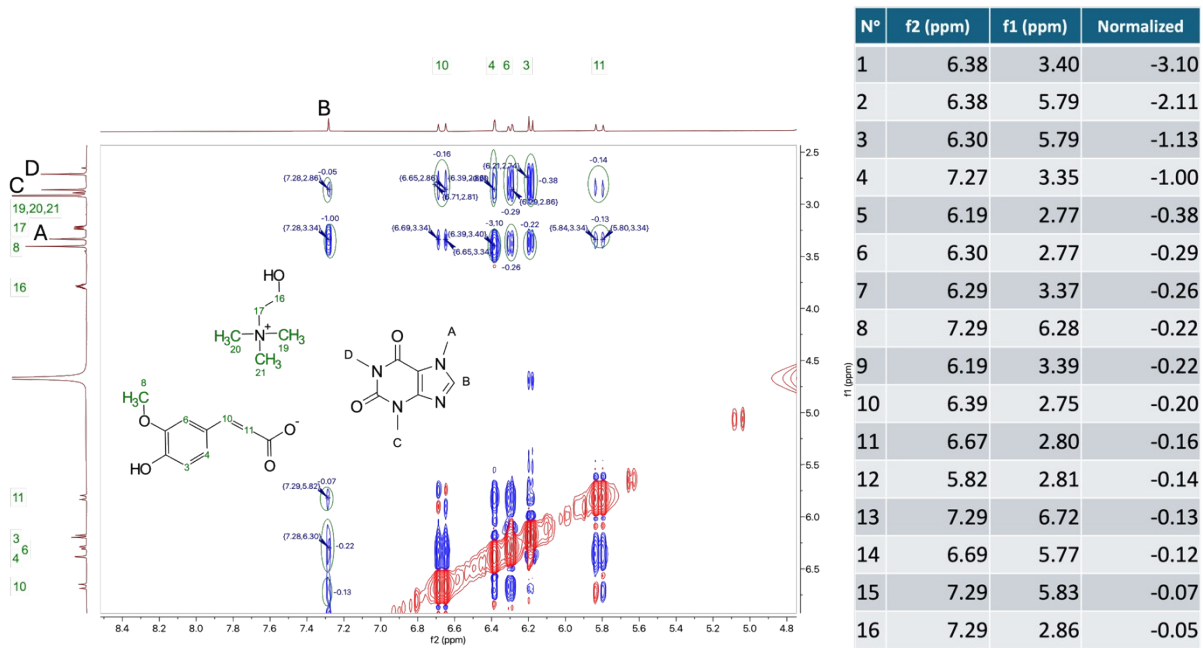

Figure S11: ROESY Spectrum of an aqueous solution at 3.5 mol.kg<sup>-1</sup> of ChFerulate and 2.5 mol.kg<sup>-1</sup> of Caffeine

### Molecular Dynamics snapshots

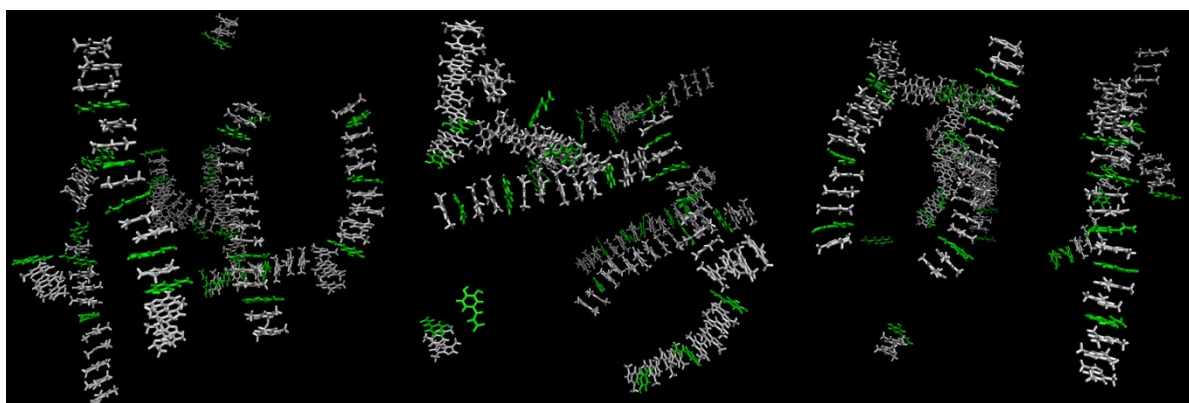

Figure S12: Snapshots from different point of view of the last frame of a 300ns molecular dynamics simulation of a 0.1 mol/kg NaCaffeate (Green) and 0.25 mol/kg Caffeine (white) aqueous solution

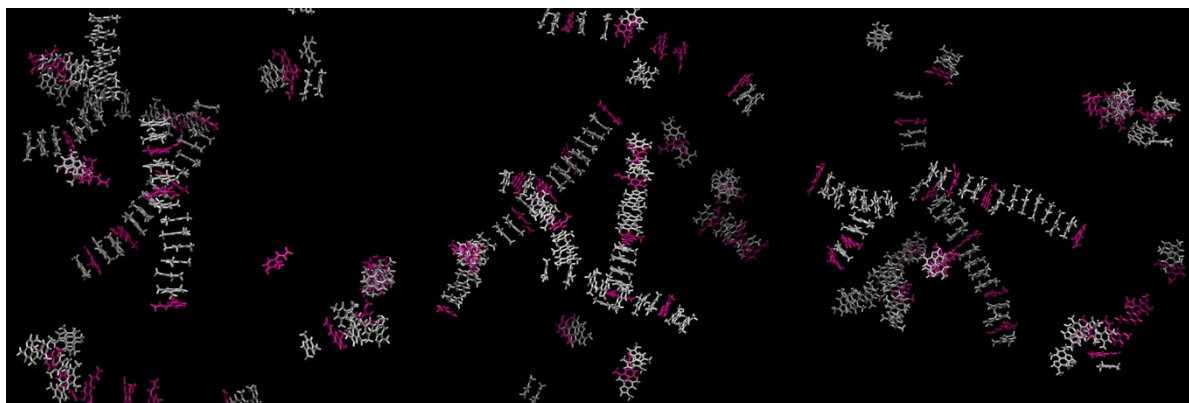

Figure S13: Snapshots from different point of view of the last frame of a 300ns molecular dynamics simulation of a 0.1mol/kg NaFerulate (Pink) and 0.25mol/kg Caffeine (white) aqueous solution

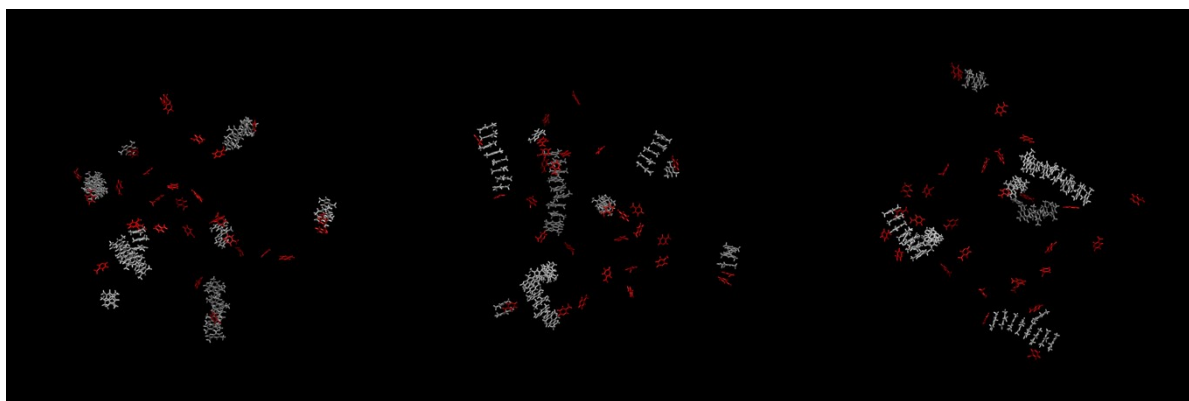

Figure S14: Snapshots from different point of view of the last frame of a 300ns molecular dynamics simulation of a 0.1mol/kg NaNicotinate (Red) and 0.15mol/kg Caffeine (white) aqueous solution

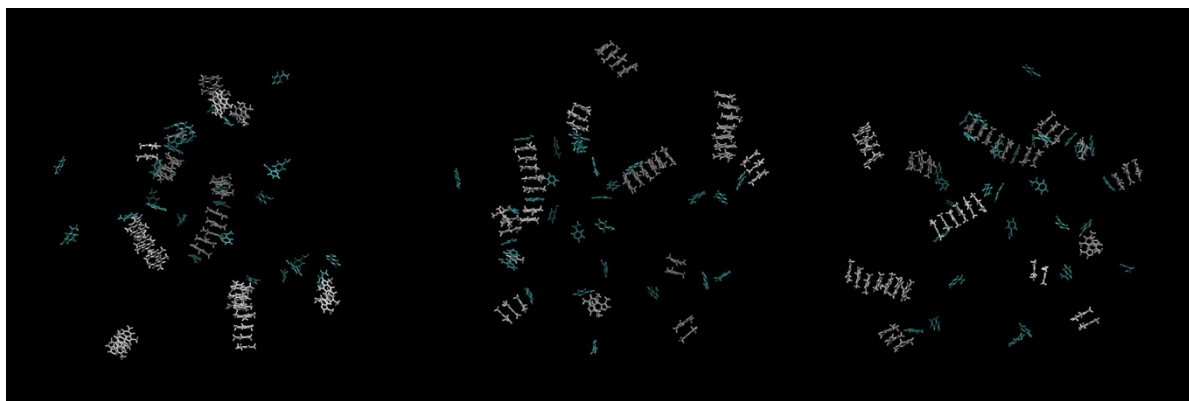

Figure S15: Snapshots from different point of view of the last frame of a 300ns molecular dynamics simulation of a 0.1mol/kg Niacinamide (Cyan) and 0.15mol/kg Caffeine (white) aqueous solution

### Calculated polarizability of compounds:

| Compound    | Polarizability ( $\text{\AA}^3$ ) |
|-------------|-----------------------------------|
| Salicylate  | 14.9                              |
| Niacinamide | 12.6                              |

|            |      |
|------------|------|
| Nicotinate | 13.3 |
| Ferulate   | 23.1 |
| Caffeate   | 21   |
| Caffeine   | 18.7 |
